# Supplementary material
Source: PubMed Central journal article supplement (PMC3811376)
Supplement: AEM.01843-13_zam999104746so1.pdf [file AEM.01843-13_zam999104746so1.pdf]

## SUPPLEMENTARY MATERIAL

**TABLE S1:** List of *Bifidobacterium* strains used in this study.

| Code      | Species                          | Additional strain information <sup>a</sup> | Source               |
|-----------|----------------------------------|--------------------------------------------|----------------------|
| UCC2003   | <i>B. breve</i>                  | (1)                                        | Infant nursing stool |
| ATCC15700 | <i>B. breve</i>                  | JCM1192; DSM20213                          | Infant feces         |
| ATCC15698 | <i>B. breve</i>                  | JCM1273; DSM20091                          | Infant feces         |
| ATCC15701 | <i>B. breve</i>                  | JCM7016                                    | Infant feces         |
| JCM7017   | <i>B. breve</i>                  |                                            | Human feces          |
| JCM7019   | <i>B. breve</i>                  |                                            | Infant feces         |
| JCM7020   | <i>B. breve</i>                  |                                            | Infant feces         |
| S-17c     | <i>B. breve</i>                  | (2)                                        | Infant feces         |
| S-46      | <i>B. breve</i>                  | (2)                                        | Infant feces         |
| SC81      | <i>B. breve</i>                  | This study                                 | Infant feces         |
| SC95      | <i>B. breve</i>                  | This study                                 | Infant feces         |
| SC139     | <i>B. breve</i>                  | This study                                 | Infant feces         |
| SC154     | <i>B. breve</i>                  | This study                                 | Infant feces         |
| SC500     | <i>B. breve</i>                  | This study                                 | Infant feces         |
| SC506     | <i>B. breve</i>                  | This study                                 | Infant feces         |
| SC508     | <i>B. breve</i>                  | This study                                 | Infant feces         |
| SC522     | <i>B. breve</i>                  | This study                                 | Infant feces         |
| SC559     | <i>B. breve</i>                  | This study                                 | Infant feces         |
| SC567     | <i>B. breve</i>                  | This study                                 | Infant feces         |
| SC568     | <i>B. breve</i>                  | This study                                 | Infant feces         |
| SC573     | <i>B. breve</i>                  | This study                                 | Infant feces         |
| SC580     | <i>B. breve</i>                  | This study                                 | Infant feces         |
| SC670     | <i>B. breve</i>                  | This study                                 | Infant feces         |
| KA179     | <i>B. breve</i>                  | This study                                 | Infant feces         |
|           | <i>B. longum subsp.</i>          |                                            |                      |
| ATCC15697 | <i>infantis</i>                  | JCM1222; DSM20088                          | Infant feces         |
| JCM10602  | <i>B. animalis subsp. lactis</i> | DSMZ 10140                                 | Dairy product        |

<sup>a</sup>The original strain numbers are also noted, if known. JCM, Japan Collection of Microorganisms, ATCC, American Type Culture Collection; DSMZ, German Collection of Microorganisms and Cell Culture.

**TABLE S2: MLST genes and primers.**

| Gene        | PCR primer (5'-3')* <sup>a</sup>                                   | Expected Amplicon size (bp) | Anneling Temp. (°C) |
|-------------|--------------------------------------------------------------------|-----------------------------|---------------------|
| <i>clpC</i> | GAG TAC CGC AAG TAC ATC GAG<br>CAT CCT CAT CGT CGA ACA GGA AC      | 748                         | 63                  |
| <i>purF</i> | CAT TCG AAC TCC GAC ACC GA<br>GTG GGG TAG TCG CCG TTG              | 977                         | 62                  |
| <i>gyrB</i> | AGC TGC ACG CBG GCG GCA AGT TCG<br>GTT GCC GAG CTT GGT CTT GGT CTG | 811                         | 66                  |
| <i>fusA</i> | ATC GGC ATC ATG GCY CAC ATY GAT<br>CCA GCA TCG GCT GMA CRC CCT T   | 784                         | 66                  |
| <i>Iles</i> | ATC CCG CGY TAC CAG ACS ATG<br>CGG TGT CGA CGT AGT CGG CG          | 789                         | 66                  |
| <i>rplB</i> | GGA CAA GGA CGG CRT SCC SGC CAA<br>ACG ACC RCC GTG CGG GTG RTC GAC | 498                         | 67                  |
| <i>rpoB</i> | GGC GAG CTG ATC CAG AAC CA<br>GCA TCC TCG TAG TTG TAS CC           | 1057                        | 62                  |

\*= Upper sequence, forward primer; Lower sequence, reverse primer.

<sup>a</sup> In the primer sequence R indicates (A/G), S (C/G), Y (C/T).

**TABLE S3:** Descriptive evolutionary analysis of MLST data.

| Gene        | Fragment analyzed(bp)* | G+C (mol%) | polymorphic sites | Alle frequencies | $\pi$   | k        |
|-------------|------------------------|------------|-------------------|------------------|---------|----------|
| <i>clpC</i> | 678 (0,25)             | 61,97      | 14                | 8                | 0,00404 | 2,739    |
| <i>purF</i> | 855 (0,56)             | 62,33      | 65                | 11               | 0,01308 | 11,18116 |
| <i>gyrB</i> | 688 (0,33)             | 60,17      | 14                | 12               | 0,00335 | 2,30435  |
| <i>fusA</i> | 753(0,35)              | 60,35      | 14                | 8                | 0,00319 | 2,4058   |
| <i>Iles</i> | 743(0,22)              | 61,51      | 41                | 12               | 0,0148  | 10,78986 |
| <i>rplB</i> | 428 (0,51)             | 64,75      | 8                 | 5                | 0,00273 | 1,16667  |
| <i>rpoB</i> | 965 (0,27)             | 62,89      | 16                | 11               | 0,00353 | 3,4058   |

\*Percentage of the gene is given in parenthesis.

$\pi$  = mean pairwise nucleotide difference per site.

k = mean pairwise nucleotide difference per sequence.

**TABLE S4:** Allelic profiles of 24 *B. breve* strains analyzed by MLST.

| Strains   | ST <sup>a</sup> | Allele      |             |             |             |             |             |             |
|-----------|-----------------|-------------|-------------|-------------|-------------|-------------|-------------|-------------|
|           |                 | <i>clpC</i> | <i>purF</i> | <i>gyrB</i> | <i>fusA</i> | <i>Iles</i> | <i>rplB</i> | <i>rpoB</i> |
| UCC2003   | 1               | 1           | 1           | 1           | 1           | 1           | 1           | 1           |
| ATCC15700 | 2               | 1           | 2           | 2           | 1           | 2           | 2           | 2           |
| ATCC15698 | 3               | 1           | 3           | 3           | 1           | 3           | 3           | 3           |
| ATCC15701 | 4               | 2           | 4           | 4           | 1           | 4           | 3           | 4           |
| JCM7017   | 4               | 2           | 4           | 4           | 1           | 4           | 3           | 4           |
| JCM7019   | 5               | 3           | 5           | 5           | 7           | 5           | 3           | 5           |
| JCM7020   | 6               | 4           | 6           | 5           | 8           | 6           | 3           | 6           |
| S-17c     | 7               | 1           | 7           | 6           | 1           | 4           | 3           | 2           |
| S-46      | 8               | 2           | 4           | 4           | 1           | 4           | 3           | 7           |
| SC81      | 9               | 5           | 8           | 7           | 2           | 7           | 3           | 8           |
| SC95      | 10              | 6           | 9           | 8           | 1           | 3           | 3           | 3           |
| SC139     | 11              | 7           | 3           | 8           | 1           | 8           | 3           | 4           |
| SC154     | 12              | 2           | 1           | 8           | 1           | 3           | 3           | 1           |
| SC500     | 13              | 1           | 10          | 3           | 2           | 3           | 4           | 9           |
| SC506     | 14              | 6           | 9           | 8           | 3           | 3           | 1           | 3           |
| SC508     | 15              | 1           | 1           | 9           | 1           | 9           | 5           | 2           |
| SC522     | 9               | 5           | 8           | 7           | 2           | 7           | 3           | 8           |
| SC559     | 16              | 1           | 1           | 10          | 1           | 10          | 3           | 10          |
| SC567     | 17              | 1           | 11          | 8           | 6           | 11          | 3           | 1           |
| SC568     | 10              | 6           | 9           | 8           | 1           | 3           | 3           | 3           |
| SC573     | 18              | 2           | 4           | 11          | 1           | 3           | 3           | 3           |
| SC580     | 9               | 5           | 8           | 7           | 2           | 7           | 3           | 8           |
| SC670     | 19              | 1           | 1           | 12          | 5           | 11          | 3           | 11          |
| KA179     | 20              | 8           | 3           | 8           | 4           | 12          | 3           | 9           |

<sup>a</sup>ST Indicates specific sequence type.

**Table S5:** Genebank accession numbers for glycosyl hydrolase.

| Glycosyl hydrolase name | Protein sequences accession numbers                                                                                                                                    |
|-------------------------|------------------------------------------------------------------------------------------------------------------------------------------------------------------------|
| Blon_2335               | YP_002323771.1; ZP_06596922.1; ZP_03742645.1; ZP_03167824.1; NP_241708.1; ZP_03474775.1; YP_003010680.1; ZP_04552485.1; ZP_07812017.1                                  |
| Blon_2336               | YP_002323772.1; WP_003795385.1; WP_007588699.1; YP_001297867.1; WP_006775425.1; YP_003822597.1; WP_008706707.1; WP_009776262.1                                         |
| Blon_0248/0426          | YP_002321754.1; ZP_08285605.1; ZP_08026776.1; ZP_06607921.1; ZP_06184004.1; YP_002533924.1; ZP_05989289.1; ZP_02477566.1; YP_001851141.1; ZP_03212758.1; ZP_05280631.1 |
| Blon_0346               | YP_002321848.1; ZP_02040503.1; ZP_02079496.1; ZP_08131039.1; ZP_05718978.1; YP_004456548.1; P_003242853.1; YP_002547035.1                                              |
| Blon_2348               | YP_002323784.1; WP_003818390.1; ACH92844.1; WP_003796112.1; ACH92824.1; BAD66680.2                                                                                     |
| Blon_0646               | YP_002322131.1; YP_007554019.1                                                                                                                                         |
| Blon_0459               | YP_002321953.1; YP_007555353.1                                                                                                                                         |

**TABLE S6:** Glycosyl hydrolase gene and qPCR primers.

| Primer name     | Primer sequence (5'-3') <sup>a</sup> | Expected amplicon size (bp) | Anneling Temp. (°C) |
|-----------------|--------------------------------------|-----------------------------|---------------------|
| Blon_2335F      | GARATGAAYTAYTGGATG                   | 960                         | 56 °C               |
| Blon_2335R      | TTNCCRTCDATYTGRAANGGNGG              |                             |                     |
| Blon_2336F      | AARCAYCAYGAYGGNTTYTG                 | 600                         | 55 °C               |
| Blon_2336R      | ACYTCNGCNGGRTACCA                    |                             |                     |
| Blon_0248/0426F | TAYGCNGARTGGTAY                      | 210                         | 45 °C               |
| Blon_0248/0426R | TCRTGRTGYTTNGTNGT                    |                             |                     |
| Blon_0346F      | YTNGAYTTYCAYACNWS                    | 740                         | 48 °C               |
| Blon_0346R      | TCRTGRTGYTTNGTNGT                    |                             |                     |
| Blon_2348F      | ATHACNGCNGAYATHAC                    | 250                         | 45 °C               |
| Blon_2348R      | TCNACNACYTTRTTYTCRTC                 |                             |                     |
| Blon_0646F      | CCACCAGACATGGAACAGTG                 | 220                         | 60 °C               |
| Blon_0646R      | AAATCGCCGAAGGTGATATG                 |                             |                     |
| Blon_0459F      | CCCCACCCTCGACTGGCTCA                 | 510                         | 62 °C               |
| Blon_459R       | CTTCGAGGTGGCACAGG                    |                             |                     |
| 0248WF          | ACCAACAACCAGCAACCAAT                 | 135                         | 56 °C               |
| 0248WR          | ATCGAATACGGCACCTTCAG                 |                             |                     |
| 0426WF          | ACCAACAACCAGCAACCAAT                 | 135                         | 56 °C               |
| 0426WR          | GACCGCCTTCATGGATAAGA                 |                             |                     |
| RNP-F           | AACCTGATGATCGGACGACG                 | 182                         | 60 °C               |
| RNP-R           | GGCAAACCTGCTCATCCAACG                |                             | 60 °C               |
| GH29-F          | GGACTGAAGTTCGGCGTGTA                 | 160                         | 60 °C               |
| GH29-R          | TCGTTGTCCTCCTCCGAGAT                 |                             | 60 °C               |
| GH95-F          | CGCGGACTACCGCAGATATT                 | 163                         | 60 °C               |
| GH95-R          | ATCGAACATTGCCTCTGCCA                 |                             | 60 °C               |

<sup>a</sup> In the primer sequence R indicates (A/G), W (A/T), S (C/G), Y (C/T), H (A/C/T), D (A/G/T), N (A/C/G/T).

**TABLE S7:** Kinetic analysis of bacterial growth in 2% HMO.

| Strain    | Kinetic parameters in 2% HMO |            |              |         |                     |         |                 |          |
|-----------|------------------------------|------------|--------------|---------|---------------------|---------|-----------------|----------|
|           | Growth rate (1/h)            | SD         | Lag time (h) | SD      | Generation time (h) | SD      | Max. OD (600nm) | SD       |
| UCC2003   | 6.70E-02                     | ± 7.55E-03 | 3.070        | ± 0.132 | 4.531               | ± 0.543 | 0.524           | ± 0.055  |
| ATCC15700 | 6.16E-02                     | ± 1.12E-02 | 5.420        | ± 0.042 | 5.007               | ± 1.001 | 0.538           | ± 0.025  |
| ATCC15698 | 7.98E-02                     | ± 2.14E-03 | 4.260        | ± 0.118 | 3.772               | ± 0.102 | 0.656           | ± 0.065  |
| ATCC15701 | 5.77E-02                     | ± 2.22E-03 | 2.445        | ± 0.881 | 5.225               | ± 0.206 | 0.779           | ± 0.040  |
| JCM7017   | 7.19E-02                     | ± 4.50E-03 | 5.549        | ± 0.096 | 4.199               | ± 0.257 | 0.656           | ± 0.021  |
| JCM7019   | 9.94E-02                     | ± 4.55E-03 | 7.653        | ± 0.310 | 3.033               | ± 0.135 | 0.655           | ± 0.014  |
| JCM7020   | 8.51E-02                     | ± 2.08E-03 | 4.016        | ± 0.083 | 3.538               | ± 0.087 | 0.661           | ± 0.015  |
| S-17c     | 7.26E-02                     | ± 7.21E-03 | 6.161        | ± 0.237 | 4.170               | ± 0.398 | 0.540           | ± 0.013  |
| S-46      | 8.36E-02                     | ± 9.27E-03 | 4.413        | ± 0.073 | 3.627               | ± 0.378 | 0.71            | ± 0.033  |
| SC81      | 1.07E-01                     | ± 4.81E-03 | 6.331        | ± 0.108 | 2.825               | ± 0.129 | 0.715           | ± 0.033  |
| SC95      | 1.20E-01                     | ± 6.43E-03 | 4.655        | ± 0.047 | 2.523               | ± 0.131 | 0.859           | ± 0.029  |
| SC139     | 9.41E-02                     | ± 9.16E-03 | 5.390        | ± 0.204 | 3.219               | ± 0.297 | 0.667           | ± 0.015  |
| SC154     | 7.54E-02                     | ± 5.22E-03 | 6.295        | ± 0.166 | 4.007               | ± 0.281 | 0.768           | ± 0.031  |
| SC500     | 5.24E-02                     | ± 3.65E-03 | 13.512       | ± 0.362 | 5.759               | ± 0.404 | 0.558           | ± 0.026  |
| SC506     | 5.92E-02                     | ± 2.66E-03 | 3.806        | ± 0.050 | 5.088               | ± 0.222 | 0.731           | ± 0.0007 |
| SC508     | 4.26E-02                     | ± 2.37E-03 | 5.157        | ± 0.070 | 7.086               | ± 0.390 | 0.277           | ± 0.054  |
| SC522     | 4.88E-02                     | ± 1.14E-02 | 1.050        | ± 0.223 | 6.439               | ± 1.715 | 0.698           | ± 0.047  |
| SC559     | 6.26E-02                     | ± 1.27E-03 | 6.311        | ± 0.137 | 4.807               | ± 0.098 | 0.612           | ± 0.0015 |
| SC567     | 5.76E-02                     | ± 5.49E-03 | 9.953        | ± 0.765 | 5.256               | ± 0.529 | 0.567           | ± 0.042  |
| SC568     | 6.26E-02                     | ± 2.91E-03 | 6.216        | ± 0.524 | 4.815               | ± 0.220 | 0.680           | ± 0.034  |
| SC573     | 3.31E-02                     | ± 3.45E-03 | 3.419        | ± 0.123 | 9.168               | ± 0.933 | 0.306           | ± 0.014  |
| SC580     | 6.34E-02                     | ± 3.82E-03 | 2.045        | ± 0.204 | 4.762               | ± 0.284 | 0.727           | ± 0.028  |
| SC670     | 3.38E-02                     | ± 5.98E-03 | 9.886        | ± 0.234 | 9.083               | ± 1.505 | 0.332           | ± 0.054  |
| KA179     | 1.13E-01                     | ± 2.83E-03 | 6.990        | ± 1.144 | 2.673               | ± 0.066 | 0.606           | ± 0.038  |
| ATCC15697 | 2.07E-01                     | ± 3.29E-03 | 3.930        | ± 0.051 | 1.452               | ± 0.022 | 1.295           | ± 0.015  |
| JCM10602  | 1.10E-02                     | ± 1.45E-03 | 14.919       | ± 2.389 | 27.578              | ± 3.368 | 0.180           | ± 0.025  |

## Supplemental references

1. O'Connell Motherway, M., A. Zomer, S. C. Leahy, J. Reunanen, F. Bottacini, M. J. Claesson, F. O'Brien, K. Flynn, P. G. Casey, J. A. Munoz, B. Kearney, A. M. Houston, C. O'Mahony, D. G. Higgins, F. Shanahan, A. Palva, W. M. de Vos, G. F. Fitzgerald, M. Ventura, P. W. O'Toole, and D. van Sinderen. 2011. Functional genome analysis of *Bifidobacterium breve* UCC2003 reveals type IVb tight adherence (Tad) pili as an essential and conserved host-colonization factor. *Proc Natl Acad Sci U S A* 108: 11217-22.
2. Roy, D., Ward, P., and Champagne, G. 1996. Differentiation of bifidobacteria by use of pulsed-field gel electrophoresis and polymerase chain reaction. *Int J Food Microbiol* 29:11-29.



**FIGURE S1**

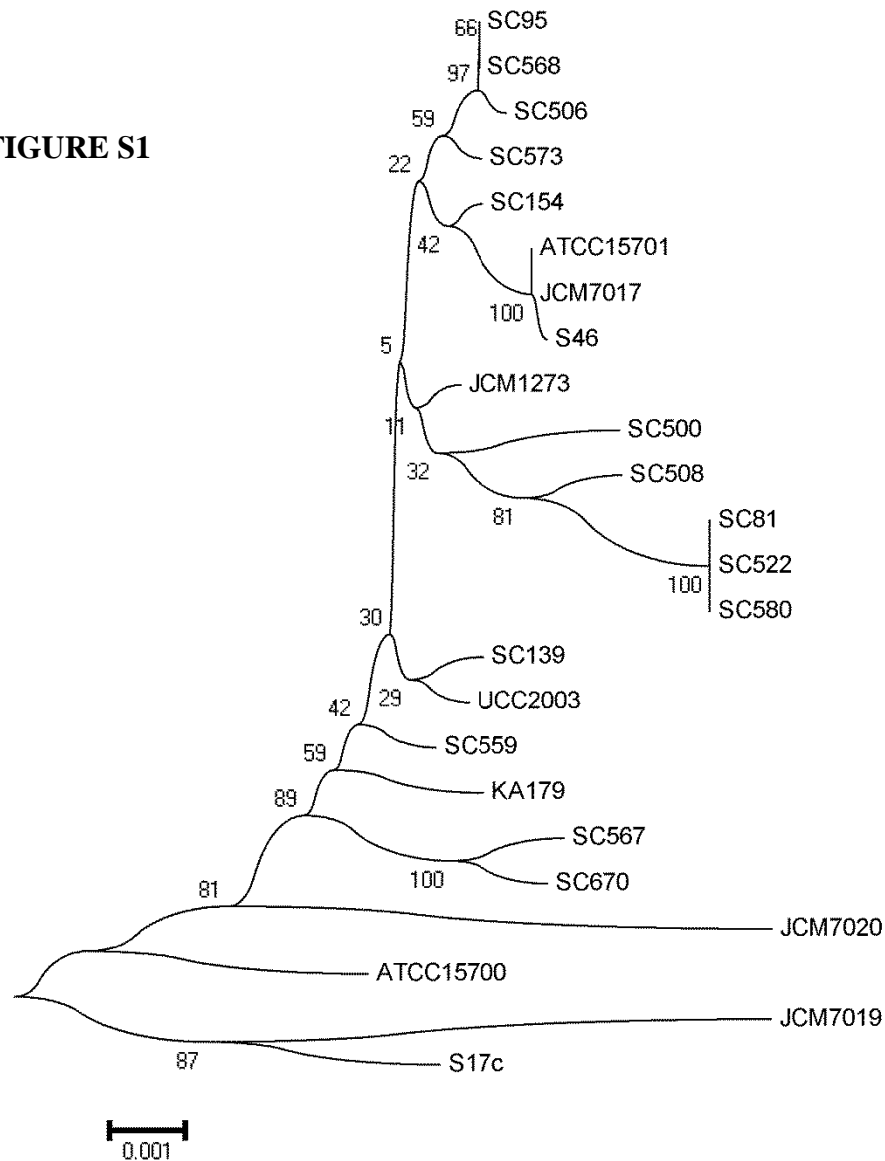

**FIGURE S1.** Evolutionary relationship of *B. breve* strains used in the study. The tree is drawn to scale, with branch lengths in the same units (number of base substitutions per site) as those of the evolutionary distances used to infer the phylogenetic tree. The evolutionary history was inferred using the Minimum Evolution method, followed by 1000 bootstrap replicates.

**FIGURE S2**

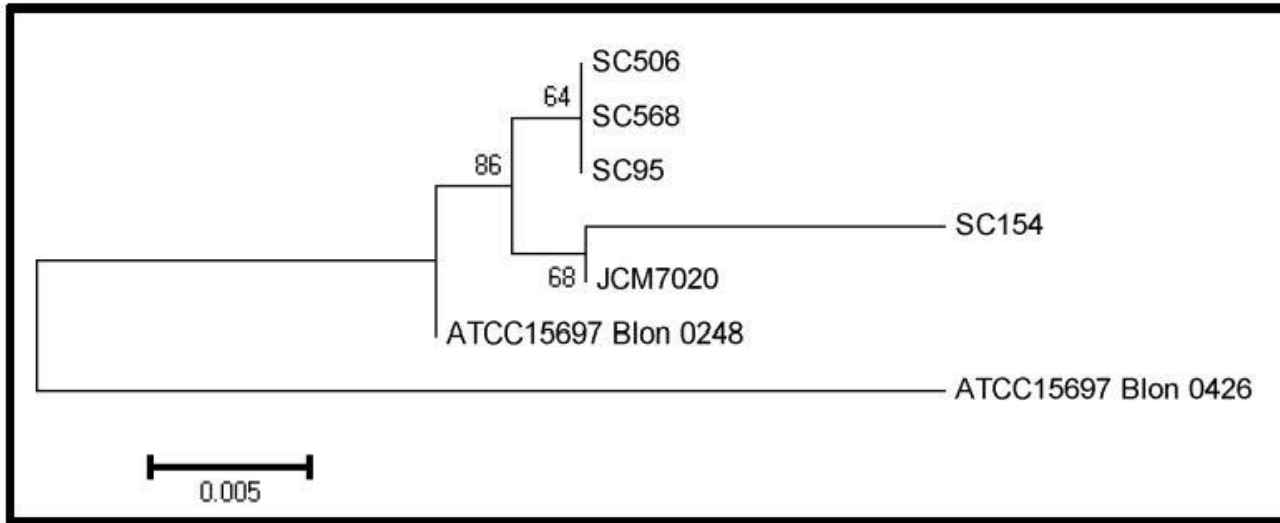

**FIGURE S2.** Phylogenetic relationship of homologous fucosidase Blon\_0248 in *B. breve* strains. The tree is drawn to scale, with branch lengths in the same units (number of amino acid substitutions per site) as those of the evolutionary distances used to infer the phylogenetic tree. The evolutionary history was inferred using the Minimum Evolution method, followed by 1000 bootstrap replicates.

**FIGURE S3**

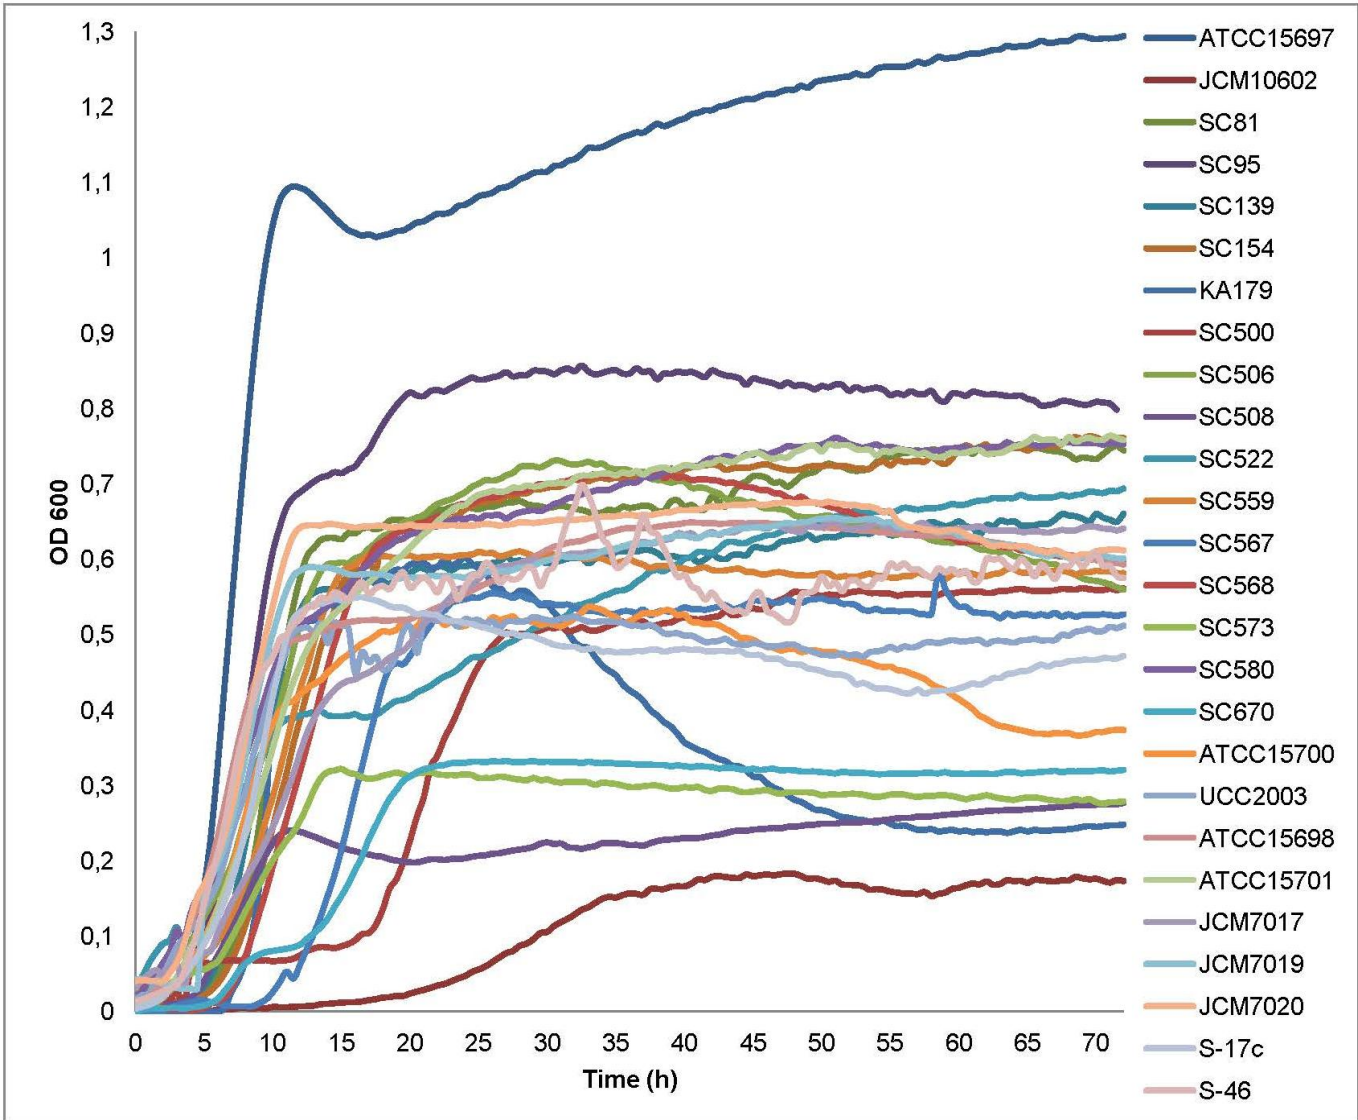

**FIGURE S3.** Growth of *B. breve* isolates on mMRS medium supplemented with 2% (w/v) HMO. *B. infantis* ATCC 15697 and *B. breve* ATCC 15700 were included as a high and low growth respectively. Growth was measured as OD of the media at 600 nm. Fermentations were carried out in triplicate; controls consisted of inoculated medium lacking of substrates and un-inoculated medium containing substrates which was also used as blank for OD measurements.

**FIGURE S4**

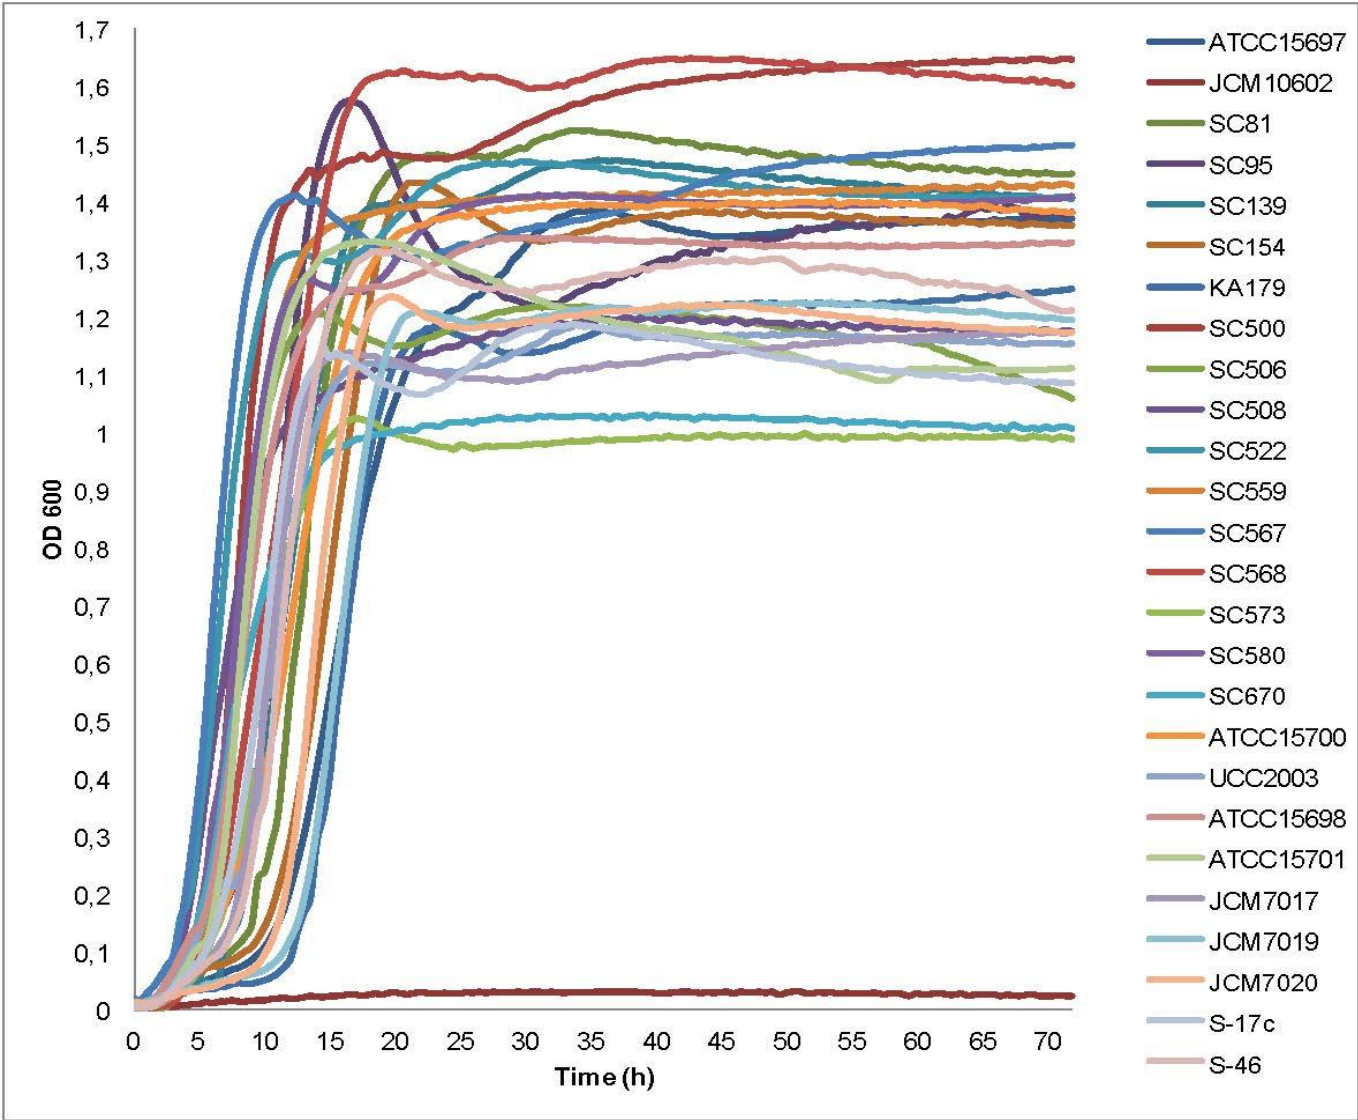

**FIGURE S4.** Growth of *B. breve* isolates on mMRS medium supplemented with 2% (w/v) LNT. *B. infantis* ATCC 15697 and *B. breve* ATCC 15700 were included as a high and low growth respectively. Growth was measured as OD of the media at 600 nm. Fermentations were carried out in triplicate; controls consisted of inoculated medium lacking of substrates and un-inoculated medium containing substrates which was also used as blank for OD measurements.

**FIGURE S5**

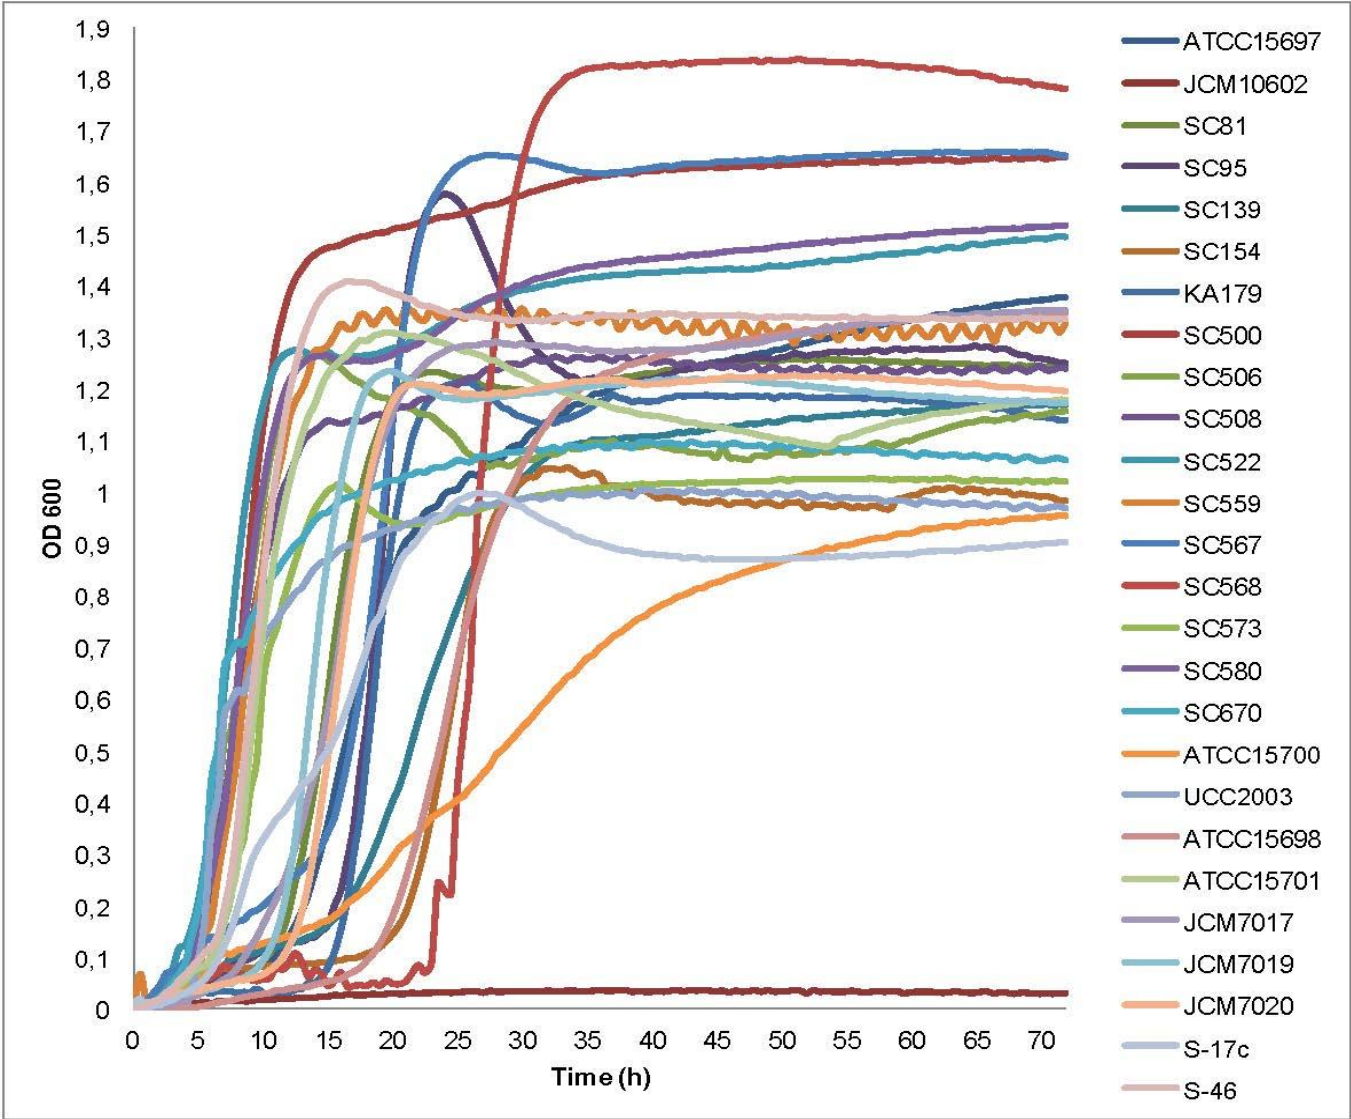

**FIGURE S5.** Growth of *B. breve* isolates on mMRS medium supplemented with 2% (w/v) LNnT. *B. infantis* ATCC 15697 and *B. breve* ATCC 15700 were included as a high and low growth respectively. Growth was measured as OD of the media at 600 nm. Fermentations were carried out in triplicate; controls consisted of inoculated medium lacking of substrates and un-inoculated medium containing substrates which was also used as blank for OD measurements.

FIGURE S6

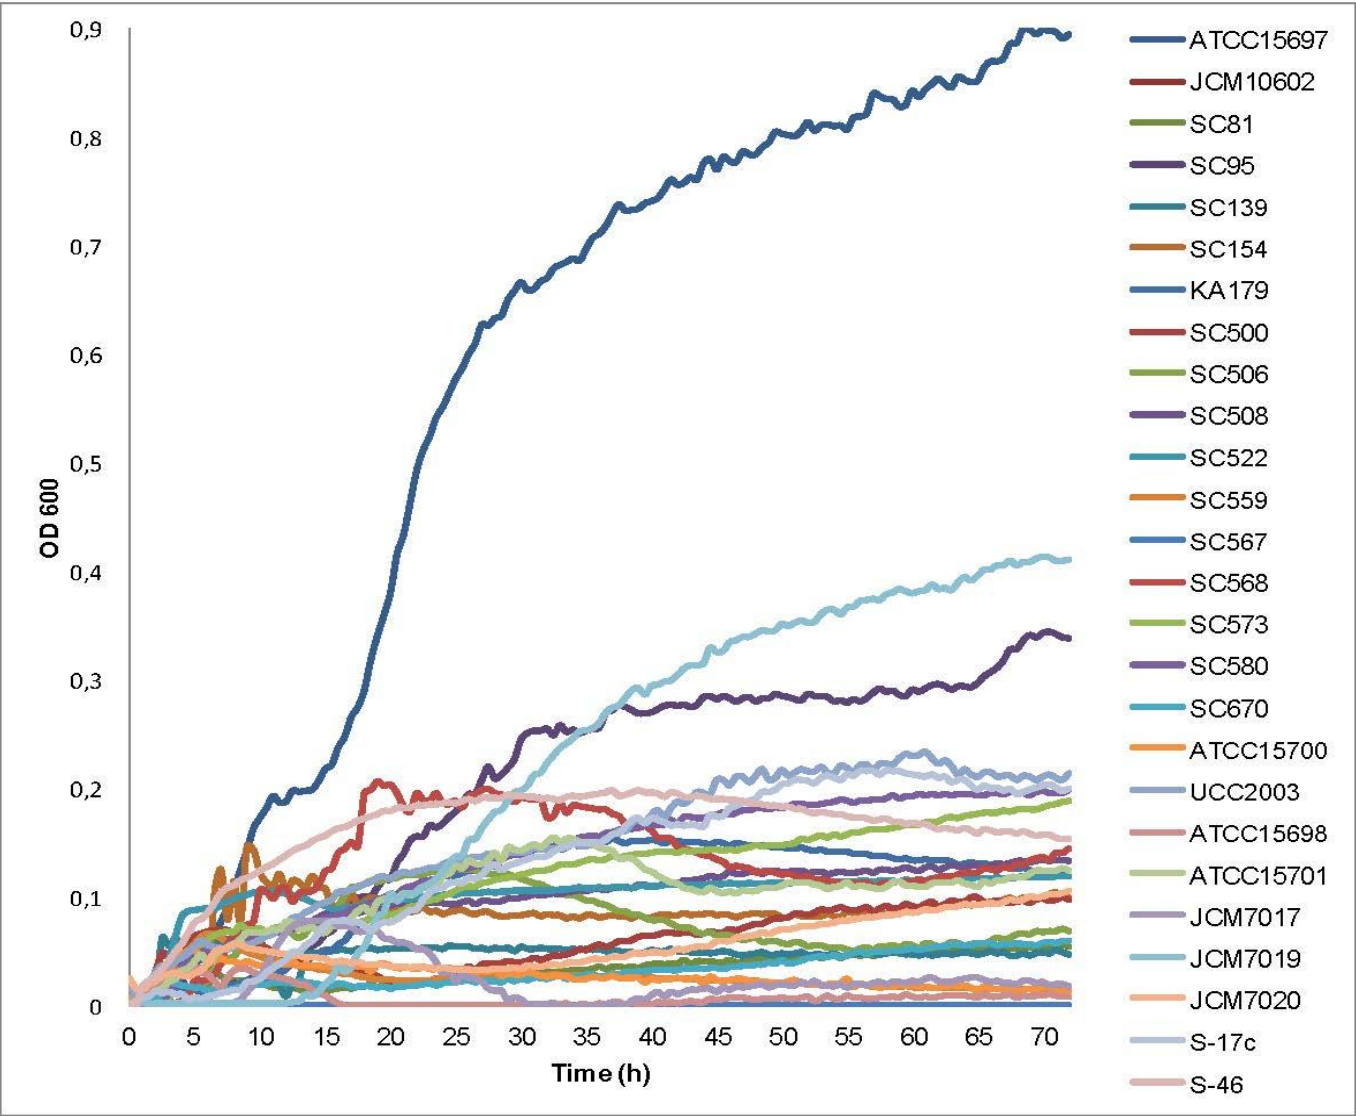

**FIGURE S6.** Growth of *B. breve* isolates on mMRS medium supplemented with 2% (w/v) 3FL. *B. infantis* ATCC 15697 and *B. breve* ATCC 15700 were included as a high and low growth respectively. Growth was measured as OD of the media at 600 nm. Fermentations were carried out in triplicate; controls consisted of inoculated medium lacking of substrates and un-inoculated medium containing substrates which was also used as blank for OD measurements.
